Anesthesiology  
62:702, 1985

### Editorial Comment

Assuming the above analysis is a valid one for ANESTHESIOLOGY, the "unfavorable ratio" referred to by the authors is 45:25 in favor of clinical articles. What is the ideal ratio? No one knows. To what degree does the Editorial Board determine the ratio? Not at all. The standing policy of this Journal is to publish the best of that which is submitted no matter the category so long

as it is appropriate to the specialty of anesthesiology. I suspect the same policy exists for the other journals surveyed. We are in a sense the victims of our authors—they determine the ratio, not the Editorial Board.

JOHN D. MICHENFELDER, M.D.  
*Editor-in-Chief*
